# Supplementary material for: Impact of Layered Perovskite Oxide La0.85Yb0.15AlO3 on Structure and Transport Properties of Polyetherimide
Source: MDPI journal article supplement (doi:10.3390/ijms24010715), 2022-12-31
Supplement: s1 [file s1]

## Supplementary Materials

**Table S1.** Calculated enthalpies, entropies, and Gibbs free energies (in Hartree) for optimized equilibrium model structures (H, S, and G, respectively).

| Model Structure      | H           | S       | G           |
|----------------------|-------------|---------|-------------|
| Cyclohexane          | -40.953141  | 74.604  | -40.988588  |
| MeOH                 | -23.932299  | 56.951  | -23.959359  |
| N <sub>2</sub>       | -19.763962  | 45.875  | -19.785759  |
| O <sub>2</sub>       | -31.778169  | 49.153  | -31.801523  |
| He                   | -2.905283   | 30.125  | -2.919596   |
| Uitem                | -339.482655 | 232.263 | -339.593011 |
| Uitem-cyclohexane    | -380.450769 | 269.864 | -380.578990 |
| Uitem-MeOH           | -363.430548 | 259.779 | -363.553977 |
| Uitem-N <sub>2</sub> | -359.251122 | 253.892 | -359.371754 |
| Uitem-O <sub>2</sub> | -371.264797 | 255.109 | -371.386008 |
| Uitem-He             | -342.387718 | 247.809 | -342.505460 |

**Table S2.** Calculated values of Gibbs free energies of reaction ( $\Delta G$ , in kcal/mol) for various hypothetical supramolecular association processes.

| Supramolecular Association Process                        | $\Delta G$ |
|-----------------------------------------------------------|------------|
| Cyclohexane + Uitem $\rightarrow$ Uitem-cyclohexane       | 1.6        |
| MeOH + Uitem $\rightarrow$ Uitem-MeOH                     | -1.0       |
| N <sub>2</sub> + Uitem $\rightarrow$ Uitem-N <sub>2</sub> | 4.4        |
| O <sub>2</sub> + Uitem $\rightarrow$ Uitem-O <sub>2</sub> | 5.4        |
| He + Uitem $\rightarrow$ Uitem-He                         | 4.5        |
